# Supplementary material for: Discovering a selective semimetal element to increase hematite photoanode charge separation efficiency
Source: Royal Society of Chemistry journal article supplement (doi:10.1039/c9ta05452a), 2019-01-01
Supplement: c9ta05452a1.pdf [file c9ta05452a1.pdf]

## Electronic Supplementary Information (ESI)

### Discovering a selective semimetal element to increase hematite photoanode charge separation efficiency

André Esteves Nogueira,<sup>a</sup> Mario Rodrigo Santos Soares,<sup>b</sup> João Batista Souza Junior,<sup>a</sup> Carlos Alberto Ospina Ramirez,<sup>a</sup> Flavio Leandro de Souza<sup>c</sup> and Edson Roberto Leite<sup>\*a,b</sup>

<sup>a</sup> Brazilian Nanotechnology National Laboratory (LNNano), Brazilian Center for Research in Energy and Materials (CNPEM), Zip Code 13083-970, Campinas, São Paulo, Brazil.

<sup>b</sup> Department of Chemistry – Federal University of São Carlos, Via Washington Luiz, km 235, CEP: 13565-905, São Carlos, SP, Brazil.

<sup>c</sup> Humanities and Nature Science Center, Federal University of ABC, Santo André-SP, Brazil.

\*E-mail: edson.leite@lnnano.cnpem.br

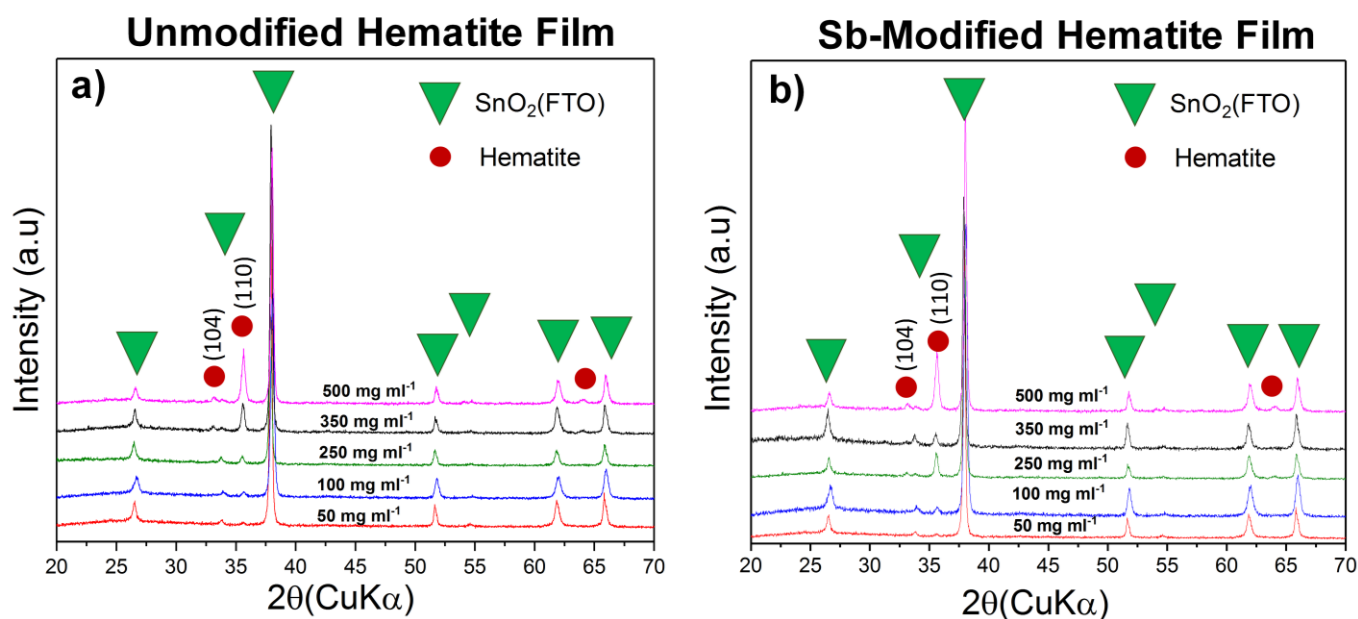

**Figure S1.** X-ray diffraction patterns of the hematite thin films deposited with different concentrations of the colloidal solution (50 to 500 mg.ml<sup>-1</sup>): a) unmodified Hematite film; b) Sb-modified hematite film.

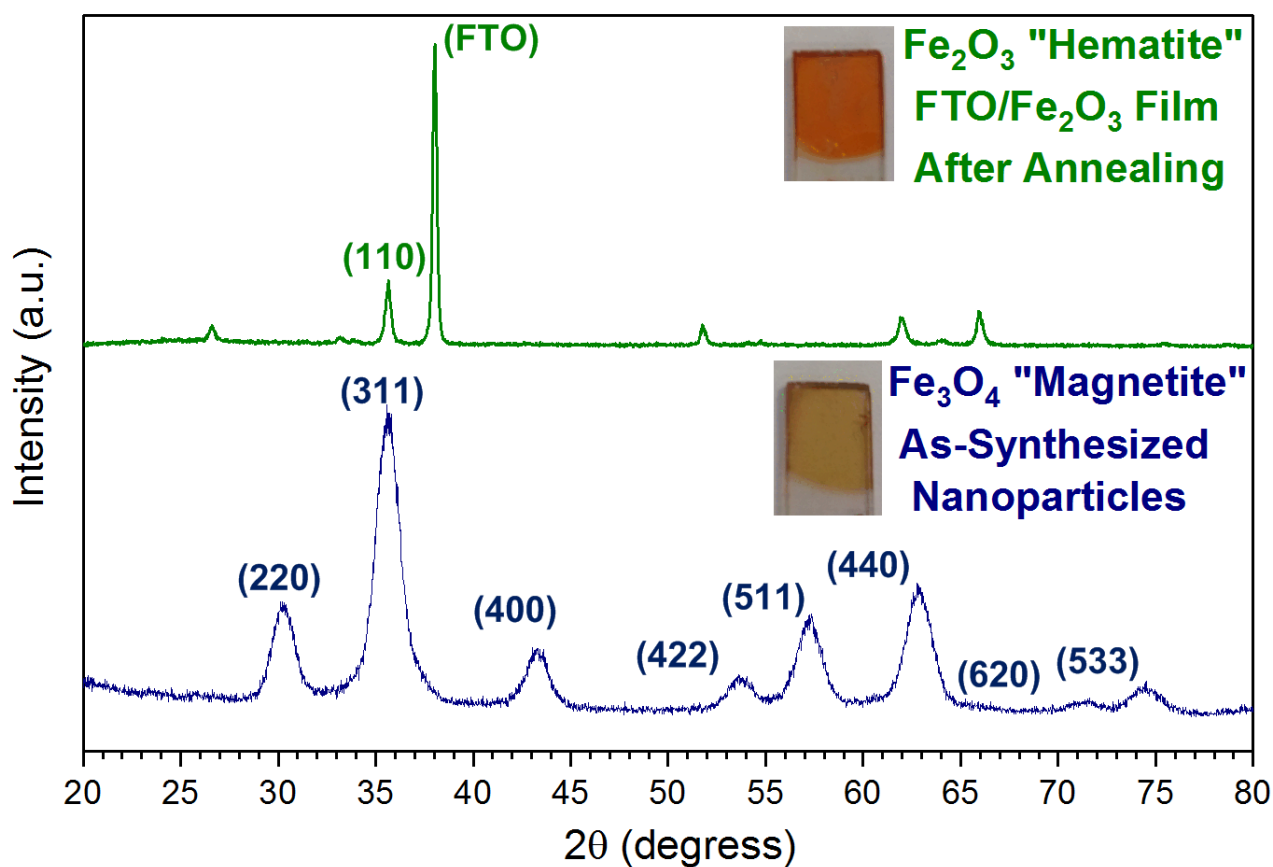

**Figure S2.** X-ray diffraction pattern of the hematite ( $\text{Fe}_2\text{O}_3$ ) thin films deposited over FTO substrate along with the pattern of the as-synthesized magnetite ( $\text{Fe}_3\text{O}_4$ ) nanoparticles. The inset photographs show the FTO films before and after phase transformation from magnetite to hematite at 850°C.

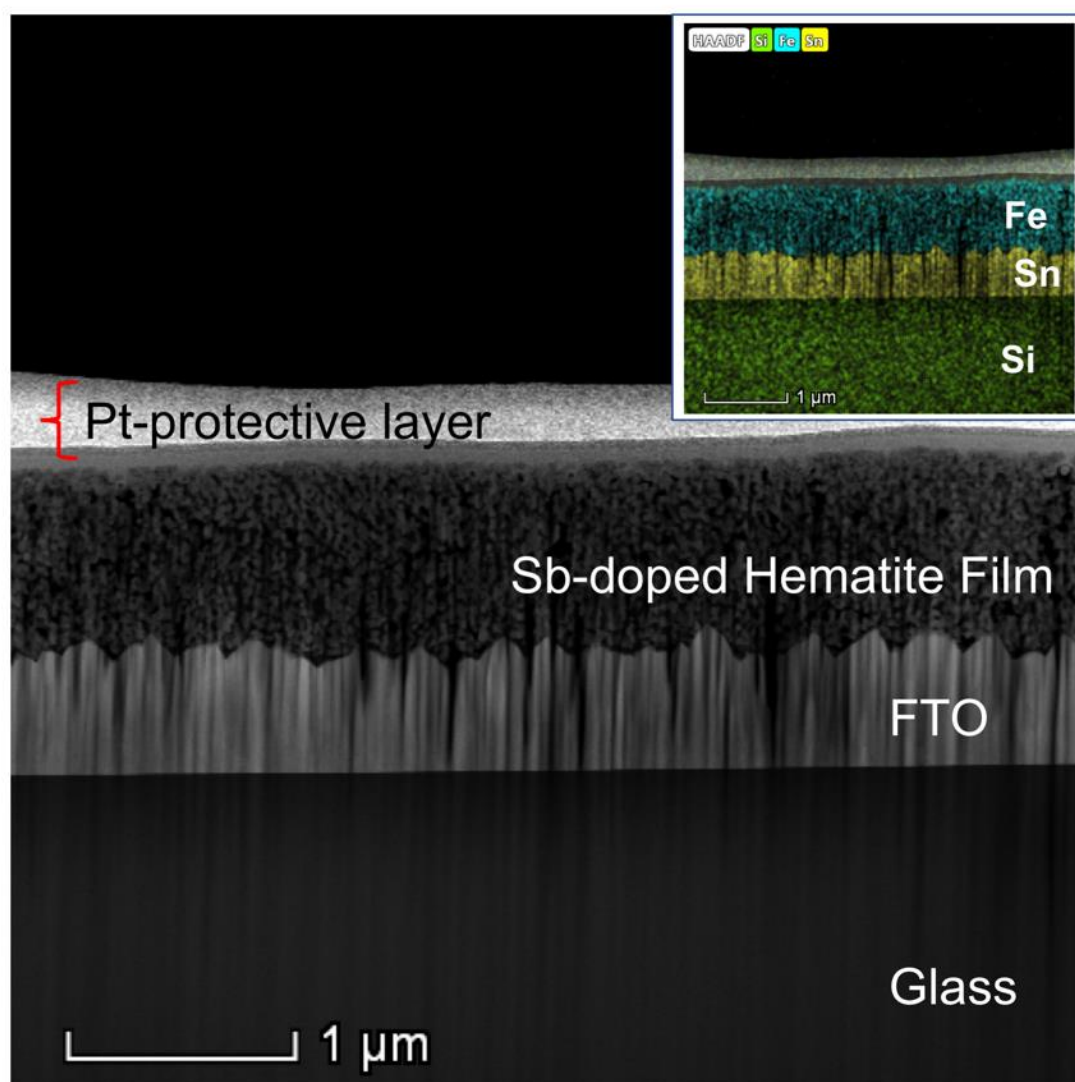

**Figure S3.** HAADF-STEM image of the cross-section analysis of the Sb-hematite film sintered at 850°C. The inset shows the EDS maps of the same region.

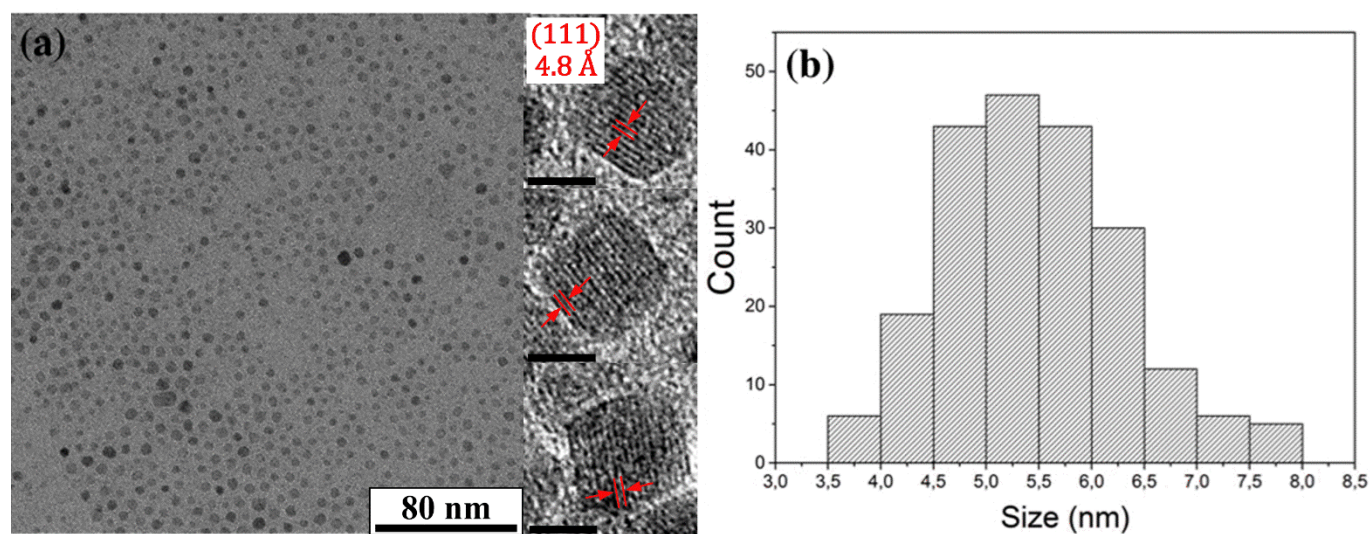

**Figure S4.** Magnetite nanoparticle characterization: (a) Low magnification TEM image of the magnetite nanoparticles used in this work along with HRTEM images showing the (111) lattice fringes with  $d_{hkl}$  equal 4.8 Å, the scale bars have 5 nm; b) Particle size distributions obtained from the TEM analysis.

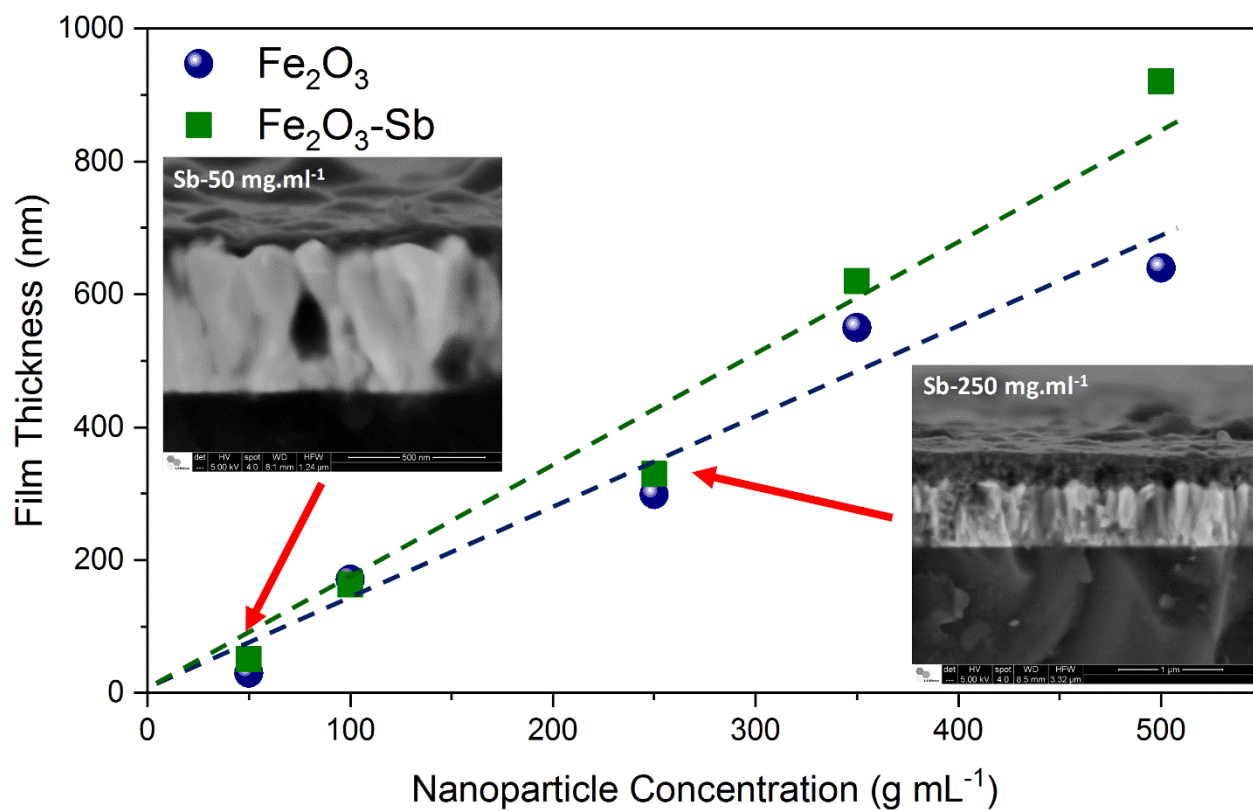

**Figure S5** - Variation of the pure and Sb-hematite film thickness as a function of the magnetite nanoparticle concentration in the colloidal solution. The insets show SEM images of Sb-hematite films.

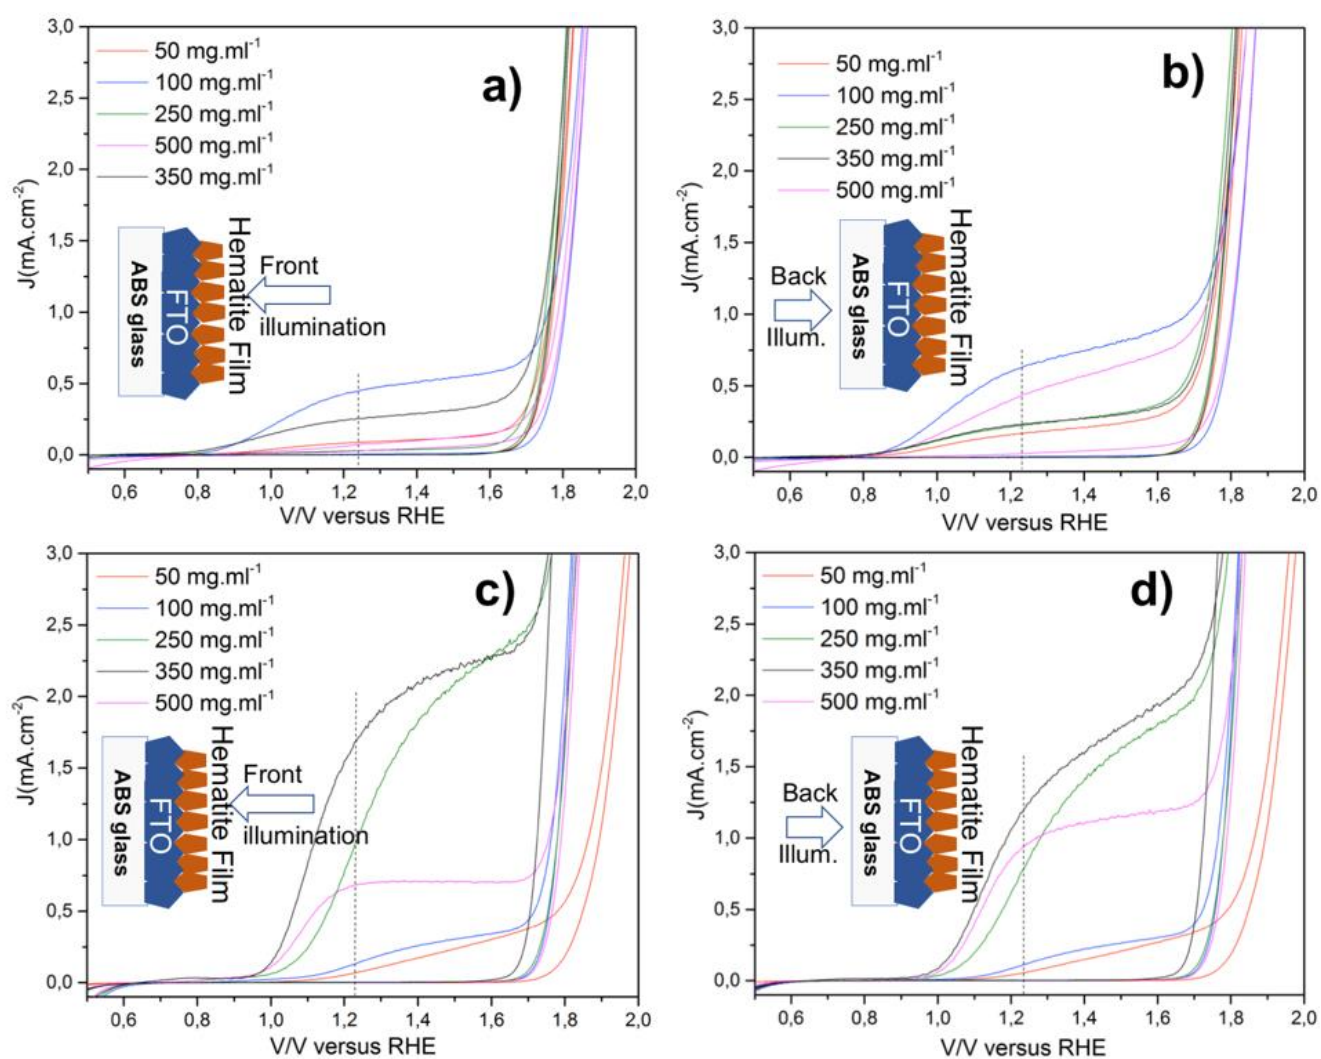

**Figure S6** - Current density,  $J$ , against Voltage,  $V_{RHE}$ , curves for (a and b) unmodified, and (c and d) Sb-hematite films with different thickness measured under dark and simulated sunlight irradiation at front side and back side, respectively.

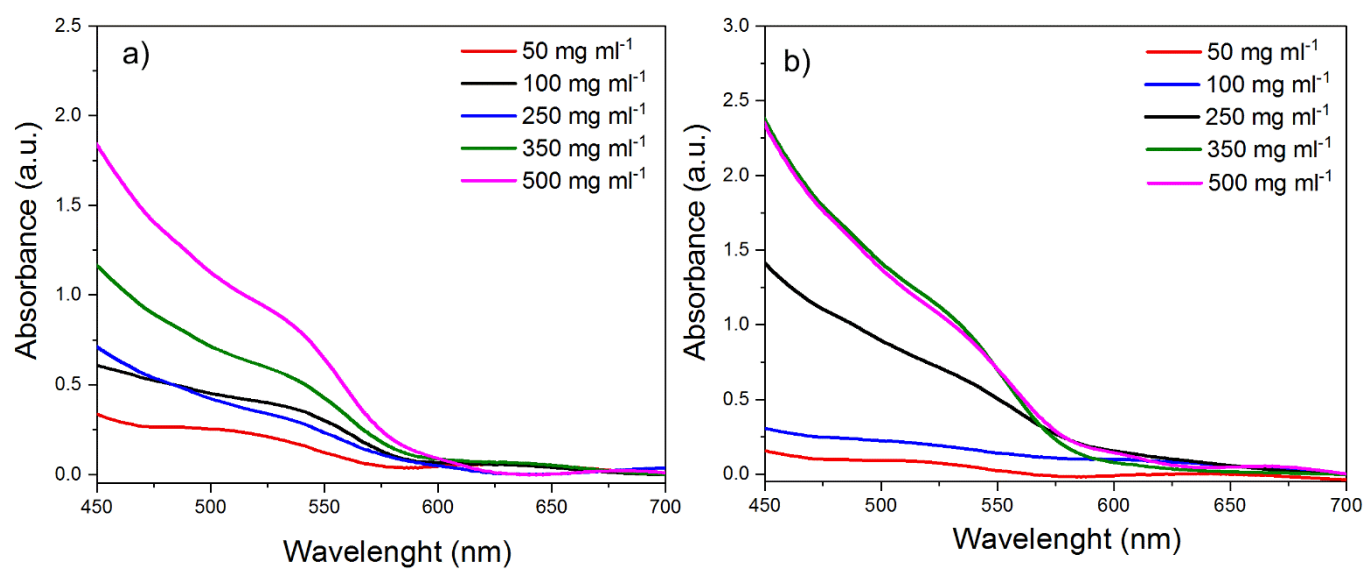

**Figure S7.** UV-Vis spectra of hematite films deposited with different nanoparticle concentration in colloidal solution (from 50 to 500 mg ml<sup>-1</sup>): a) hematite and b) Sb- hematite film.

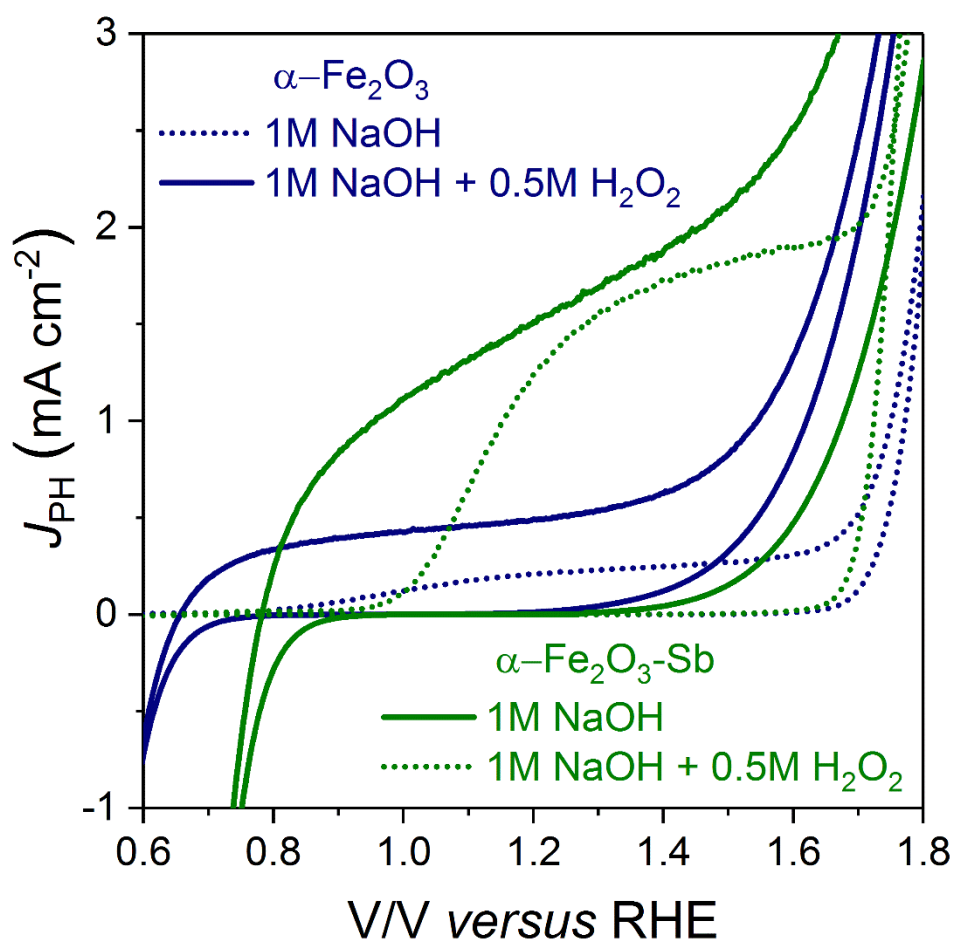

**Figure S8.**  $J_{PH} \times V$  curves in darkness and under illumination for the unmodified hematite and Sb-hematite film in 1M NaOH electrolyte with and without 0.5M  $\text{H}_2\text{O}_2$ .

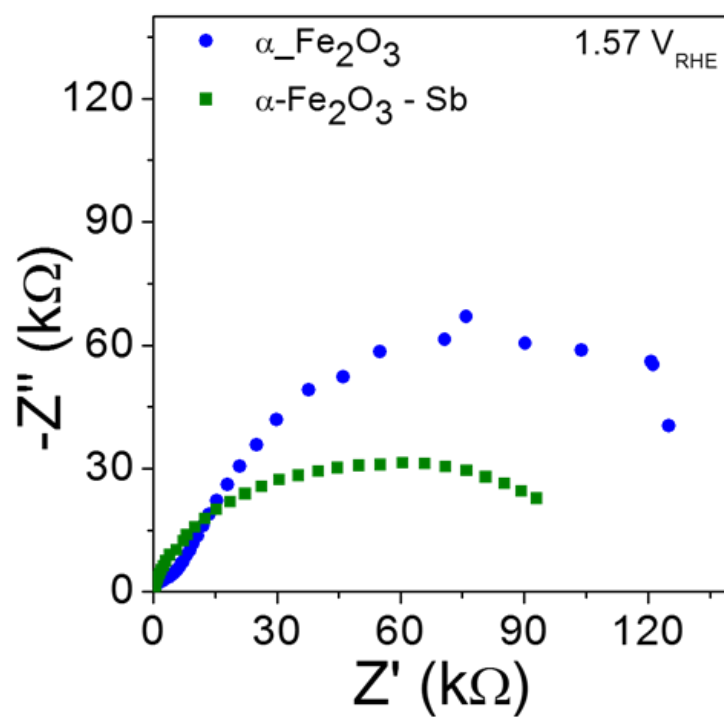

**Figure S9.** Electrochemical impedance spectra (EIS) obtained for unmodified (blue) and Sb-Hematite (green) films electrode in a 1.0 mol L<sup>-1</sup> NaOH solution.
